# Supplementary material for: The Extracellular Domain of the β2 Integrin β Subunit (CD18) Is Sufficient for Escherichia coli Hemolysin and Aggregatibacter actinomycetemcomitans Leukotoxin Cytotoxic Activity
Source: PubMed Central journal article supplement (PMC6747720; doi:10.1128/mbio.01459-19), 2019-07-09
Supplement: mBio.01459-19-st001.pdf [file mBio.01459-19-st001.pdf]

Table S1: Table of mutations in knockout cell lines

| Cell name                                                             | Target gene  | Genetic modification | Sequence                                                         |
|-----------------------------------------------------------------------|--------------|----------------------|------------------------------------------------------------------|
| $\Delta\alpha_D$                                                      | <i>ITGAD</i> | WT sequence          | 5' GGCCAACCAGACGGGGACGGCTGTATGACT 3'                             |
|                                                                       |              | -5bp                 | 5' GGCCAACCA - - - - - GGACGGCTGTATGACT 3'                       |
|                                                                       |              | +1bp                 | 5' GGCCAACCAGACGGGG <u>G</u> ACGGCTGTATGACT 3'                   |
| $\Delta\alpha_L$                                                      | <i>ITGAL</i> | WT sequence          | 5' AGTGTCTTCTCTCCTGCAAGGTCA 3'                                   |
|                                                                       |              | -2bp                 | 5' AGTGTCTTCT - - CCTGCAAGGTCA 3'                                |
|                                                                       |              | -8bp                 | 5' AGTGTCTT - - - - - - - GCAAGGTCA 3'                           |
| $\Delta\alpha_M$                                                      | <i>ITGAM</i> | WT sequence          | 5' GTGCGACTACAGCACAGGCTCATGC 3'                                  |
|                                                                       |              | -2bp                 | 5' GTGCGACTACAGCA - - GGCTCATGC 3'                               |
|                                                                       |              | -1bp                 | 5' GTGCGACTAC - GCACAGGCTCATGC 3'                                |
| $\Delta\alpha_X$                                                      | <i>ITGAX</i> | WT sequence          | 5' GGAGCTGACAGCCTTCCGTGTGG 3'                                    |
|                                                                       |              | +1bp                 | 5' GGAGCTGACAGCCTTCC <u>C</u> GTGTGG 3'                          |
| $\Delta\beta_2$                                                       | <i>ITGB2</i> | WT sequence          | 5' CAGAACTTCACAGGGCCGGGGGATCCTGACTCCATTTCG 3'                    |
|                                                                       |              | -7bp                 | 5' CAGAACTTCACAGGGCCGGGGGA - - - - - TCCATTTCG 3'                |
|                                                                       |              | -23bp                | 5' CAGAACT- - - - - - - - - - - - - - - - - - - - - TCCATTTCG 3' |
| $\Delta\alpha_{DLMX}$                                                 | <i>ITGAD</i> | WT sequence          | 5' TTGTGTCTCCAGACTCGTGGTGGGAGC 3'                                |
|                                                                       |              | -13bp                | 5' TTGTGTCT - - - - - - - - - - - TGGGAGC 3'                     |
|                                                                       |              | -4bp                 | 5' TTG - - - - TCCAGACTCGTGGTGGGAGC 3'                           |
|                                                                       |              | +1bp                 | 5' TTGTGTCTCCAG <u>C</u> ACTCGTGGTGGGAGC 3'                      |
|                                                                       | <i>ITGAL</i> | WT sequence          | 5' CAAACTTGAGAGTGTCTTCTCTCCTGCAAGGTTCAG 3'                       |
|                                                                       |              | -15bp                | 5' CAACTTG - - - - - - - - - - - - - - - CCTGCAAGGTTCAG 3'       |
|                                                                       | <i>ITGAM</i> | WT sequence          | 5' GACTACAGCACAGGCTCATGCGAGCCC 3'                                |
|                                                                       |              | -3bp                 | 5' GACTACAG - - - AGGCTCATGCGAGCCC 3'                            |
|                                                                       |              | +3bp                 | 5' GACTAC <u>CCG</u> GCACAGGCTCATGCGAGCCC 3'                     |
|                                                                       | <i>ITGAX</i> | WT sequence          | 5' TGTGGACACGCTGGGTTG 3'                                         |
|                                                                       |              | +1bp                 | 5' TGT <u>G</u> GGACACGCTGGGTTG 3'                               |
| $\Delta\alpha_{DLMX}\beta_2$<br>(derived from $\Delta\alpha_{DLMX}$ ) | <i>ITGB2</i> | WT sequence          | 5' GGGGGATCCTGACTCCATTTCGCTGCGACA 3'                             |
|                                                                       |              | -13bp                | 5' GGGGGATCC - - - - - - - - - - - TGCGACA 3'                    |
|                                                                       |              | -7bp                 | 5' GGGGGATCC - - - - - - - - - - - ATTCGCTGCGACA 3'              |
