# Supplementary material for: The Extracellular Domain of the β2 Integrin β Subunit (CD18) Is Sufficient for Escherichia coli Hemolysin and Aggregatibacter actinomycetemcomitans Leukotoxin Cytotoxic Activity
Source: PubMed Central journal article supplement (PMC6747720; doi:10.1128/mbio.01459-19), 2019-07-09
Supplement: mBio.01459-19-st002.pdf [file mBio.01459-19-st002.pdf]

Table S2: Table of primers/oligos

| Function                 | Primer name                                                                                              | Primer sequence (5'-3')                                                                                |
|--------------------------|----------------------------------------------------------------------------------------------------------|--------------------------------------------------------------------------------------------------------|
| GeCKO library sequencing | V2adaptor_F                                                                                              | AATGGACTATCATATGCTTACCGTAACTTGAAAGTATTTTCG                                                             |
|                          | V2adaptor_R                                                                                              | TCTACTATTCTTTCCCTGCACTGTgtggcgatgtg<br>cgctctg                                                         |
|                          | F01                                                                                                      | AATGATACGGCGACCACCGAGATCTACACTC<br>TTCCCTACACGACGCTCTTCCGATCTtAAGTA<br>GAGtcttggaaaggacgaaacaccg       |
|                          | F02                                                                                                      | AATGATACGGCGACCACCGAGATCTACACTC<br>TTCCCTACACGACGCTCTTCCGATCTatACAC<br>GATCtcttggaaaggacgaaacaccg      |
|                          | F03                                                                                                      | AATGATACGGCGACCACCGAGATCTACACTC<br>TTCCCTACACGACGCTCTTCCGATCTgatCGC<br>GCGGTtcttggaaaggacgaaacaccg     |
|                          | F04                                                                                                      | AATGATACGGCGACCACCGAGATCTACACTC<br>TTCCCTACACGACGCTCTTCCGATCTcgatCAT<br>GATCGtcttggaaaggacgaaacaccg    |
|                          | F05                                                                                                      | AATGATACGGCGACCACCGAGATCTACACTC<br>TTCCCTACACGACGCTCTTCCGATCTtcatCGT<br>TACCAtcttggaaaggacgaaacaccg    |
|                          | F06                                                                                                      | AATGATACGGCGACCACCGAGATCTACACTC<br>TTCCCTACACGACGCTCTTCCGATCTatcgatTC<br>CTTGGTtcttggaaaggacgaaacaccg  |
|                          | F07                                                                                                      | AATGATACGGCGACCACCGAGATCTACACTC<br>TTCCCTACACGACGCTCTTCCGATCTgatgatA<br>ACGCATtcttggaaaggacgaaacaccg   |
|                          | F08                                                                                                      | AATGATACGGCGACCACCGAGATCTACACTC<br>TTCCCTACACGACGCTCTTCCGATCTcgatcgat<br>ACAGGTAtcttggaaaggacgaaacaccg |
| F09                      | AATGATACGGCGACCACCGAGATCTACACTC<br>TTCCCTACACGACGCTCTTCCGATCTacgatcgat<br>AGGTAAGGtcttggaaaggacgaaacaccg |                                                                                                        |

|                                |                       |                                                                                                  |                                                              |
|--------------------------------|-----------------------|--------------------------------------------------------------------------------------------------|--------------------------------------------------------------|
|                                |                       |                                                                                                  |                                                              |
|                                | F10                   | AATGATACGGCGACCACCGAGATCTCACTC<br>TTCCCTACACGACGCTCTCCGATCTtAACAA<br>TGGtcttgtaaaggacgaaacaccg   |                                                              |
|                                | F11                   | AATGATACGGCGACCACCGAGATCTCACTC<br>TTCCCTACACGACGCTCTCCGATCTatACTG<br>TATCtcttgtaaaggacgaaacaccg  |                                                              |
|                                | F12                   | AATGATACGGCGACCACCGAGATCTCACTC<br>TTCCCTACACGACGCTCTCCGATCTgatAGG<br>TCGCAtcttgtaaaggacgaaacaccg |                                                              |
|                                | R universal           | CAAGCAGAAGACGGCATAACGAGATGTGACTG<br>GAGTTCAGACGTGTGCTCTCCGATCTTCTAC<br>TATTCTTCCCTGCACTGT        |                                                              |
| sgRNA                          | ITGB2(3) HGLibA_23779 | GCAGCTGATTTCCGAAAACC                                                                             |                                                              |
| targets                        | ITGAD(2) HGLibA_23750 | AGTCATACAGCCGTCCCCTC                                                                             |                                                              |
|                                | ITGAD(3) HGLib_23751  | TGTGTCTCCAGACTCGTGGT                                                                             |                                                              |
|                                | ITGAD(4) HGLib_23752  | GGACCTACCTGGCGTGGCGT                                                                             |                                                              |
|                                | ITGAL(1) HGLibB_23723 | TACTGACCTTGCAGGAGAGA                                                                             |                                                              |
|                                | ITGAL(2) HGLibB_23724 | GGATTCTGCATCACTGTGA                                                                              |                                                              |
|                                | ITGAL(3) HGLibB_23725 | TCCCCACAGTTCTTCTCAA                                                                              |                                                              |
|                                | ITGAM(2) HGLibA_23761 | TACCAGTGCAGACTACAGCAC                                                                            |                                                              |
|                                | ITGAM(3) HGLibB_23726 | TGACCTTCCAAGAGAACGCA                                                                             |                                                              |
|                                | ITGAM(4) HGLibB_23727 | CCCATGCACCTGTAAACAGA                                                                             |                                                              |
|                                | ITGAX(1) HGLibA_23766 | GGAGCTGACAGCCTTCCGTG                                                                             |                                                              |
|                                | ITGAX(2) HGLibB_23732 | CAAACCCAGCGCTGTCCACA                                                                             |                                                              |
|                                | ITGAX(3) HGLibB_23733 | GCAGCACTCCTCCTGTTCAC                                                                             |                                                              |
|                                | IDAA primers          | ITGAD(1) [sequence ITGAD(2)&(3)] F                                                               | GTA AAA CGA CGG CCA GTG AAG TGG CAA<br>ATG CCA GGA ATT TCC C |
|                                |                       | ITGAD(1) [sequence ITGAD(2)&(3)] R                                                               | AAG CGG GGG CAC AGT TGG G                                    |
| ITGAD(2) [sequence ITGAD(4)] F |                       | GTA AAA CGA CGG CCA TTC TGC CTC CAG<br>GCC TGT GG                                                |                                                              |
| ITGAD(2) [sequence ITGAD(4)] R |                       | TTC TCT CCT AGC CAC ACT CGG C                                                                    |                                                              |

|                                    |                                                       |
|------------------------------------|-------------------------------------------------------|
| ITGAL(3) [sequence ITGAL(2)] F     | GTA AAA CGA CGG CCA TGT CTA GGT TGC<br>CAG CAA ATC    |
| ITGAL(3) [sequence ITGAL(2)] R     | CCC CAT ATC CCT AAG GCC AAT                           |
| ITGAL(4) [sequence ITGAL(1)&(3)] F | GTA AAA CGA CGG CCA TGG GAG GTA AGA<br>GGG GAG AA     |
| ITGAL(4) [sequence ITGAL(1)&(3)] R | CCA AGA GAG GGA AGT GGT GT                            |
| ITGAM(3) [sequence ITAM(2)] F      | GTA AAA CGA CGG CCA ATC CGG GTA TGG<br>GCC CCC        |
| ITGAM(3) [sequence ITAM(2)] R      | AAG GAA CAC AGA GGG GTT GCC                           |
| ITGAM(4) [sequence ITAM(4)] F      | GTA AAA CGA CGG CCA TCT TTG CTT TGG<br>TGG CTT CC     |
| ITGAM(4) [sequence ITAM(4)] R      | TGT GGT CAT TCA TCC AGG CT                            |
| ITGAM(5) [sequence ITAM(3)] F      | GTA AAA CGA CGG CCA TGC TTG ATC CTT<br>CCC CCA TT     |
| ITGAM(5) [sequence ITAM(3)] R      | ATT TGT GAG GTC CCT CCT GG                            |
| ITGAX(1) [sequence ITGAX(3)] F     | GTA AAA CGA CGG CCA TTC TTC CTT CCC<br>CTG GCC ACC    |
| ITGAX(1) [sequence ITGAX(3)] R     | ATC TCA GAC CCT ATG TGC CTG C                         |
| ITGAX(2) [sequence ITGAX(1)&(2)] F | GTA AAA CGA CGG CCA ATG AGT TGG GTG<br>TCC AGA AGA CC |
| ITGAX(2) [sequence ITGAX(1)&(2)] R | TAG CTG TGA GAC CGT GCC TGC                           |
| ITGB2(5) [sequence ITGB2(1)&(2)] F | GTA AAA CGA CGG CCA AGT AGG TCC TGA<br>GTC CTT TCT GC |
| ITGB2(5) [sequence ITGB2(1)&(2)] R | TTC TGG GCA GCC CTG ACA CC                            |
| ITGB2(6) [sequence ITGB2(3)] F     | GTA AAA CGA CGG CCA CAC CCT GAT AAG<br>CTG CGA AA     |
| ITGB2(6) [sequence ITGB2(3)] R     | TTG GCC GCT CGC AAA ATG TTT AGG                       |
